# Supplementary material
Source: publisher site journal article supplement (https://www.degruyterbrill.com/publication/isbn/9783486718041/downloadAsset/9783486718041_Buchinformation.pdf)
Supplement: Supplementary file 1 [file 9783486718041_Buchinformation.pdf]

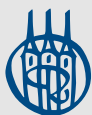

Horst Möller, Gregor Schöllgen, Andreas Wirsching (Hrsg.)

## Akten zur Auswärtigen Politik der Bundesrepublik Deutschland: 1981

Wissenschaftliche Leiterin: Ilse Dorothee Pautsch

Bearbeitet von Daniela Taschler, Matthias Peter, Judith Michel

2012. IIC, 2250 Seiten, Leinen in 3 Teilbänden

€ 158,00

ISBN 978-3-486-70560-7

Akten zur  
Auswärtigen Politik  
der Bundesrepublik  
Deutschland

1981

1. Januar bis  
31. Dezember

Herausgegeben  
im Auftrag des Auswärtigen Amtes  
vom Institut für Zeitgeschichte

Oldenbourg

### 30 Jahre danach – das „Amt“ publiziert pünktlich seine Akten

Die Krise in Polen, die in der Verhängung des Kriegsrechts kulminierte, bestimmte das Jahr 1981. Intensiv bereitete sich die NATO auf die im November beginnenden amerikanisch-sowjetischen Gespräche über Mittelstreckenraketen vor. Die Bundesregierung befürwortete die Nulllösung, auf die schließlich auch Ronald Reagan, seit Januar Präsident der USA, einschwenkte. Weitere Schwerpunkte waren die Genscher-Colombo-Initiative für eine Europäische Union, die Folgen der Ermordung des ägyptischen Präsidenten Sadat für den Frieden im Nahen Osten, der Fortgang des KSZE-Prozesses und die Diskussion über den Export von Leopard-Panzern nach Saudi-Arabien.

Herausgegeben im Auftrag des Auswärtigen Amtes vom Institut für Zeitgeschichte

Rezensionsexemplare auf Anforderung:

Pressereferat Geisteswissenschaften – Ulrike Staudinger

Oldenbourg Wissenschaftsverlag | Rosenheimer Str. 145 | 81671 München

Tel.: +49 89 45051-211 | Fax: +49 89 45051-204 | [ulrike.staudinger@oldenbourg.de](mailto:ulrike.staudinger@oldenbourg.de)

[www.oldenbourg-verlag.de](http://www.oldenbourg-verlag.de)
